# Supplementary material
Source: PubMed Central journal article supplement (PMC4623963)
Supplement: ja5b03997_si_001.pdf [file ja5b03997_si_001.pdf]

Supporting Information for

High Resolution Structural Characterization of A $\beta$ <sub>42</sub> Amyloid Fibrils by MAS NMR

Michael T. Colvin,<sup>||†</sup> Robert Silvers,<sup>||†</sup> Birgitta Frohm <sup>‡</sup> Yongchao Su,<sup>†</sup> Sara Linse,<sup>‡</sup>

and Robert G. Griffin\*<sup>†</sup>

<sup>†</sup>Department of Chemistry and Francis Bitter Magnet Laboratory  
Massachusetts Institute of Technology  
Cambridge, Massachusetts 02139

<sup>‡</sup> Department of Biochemistry and Structural Biology  
Lund University  
SE22100 Lund, Sweden

SUPPORTING FIGURES

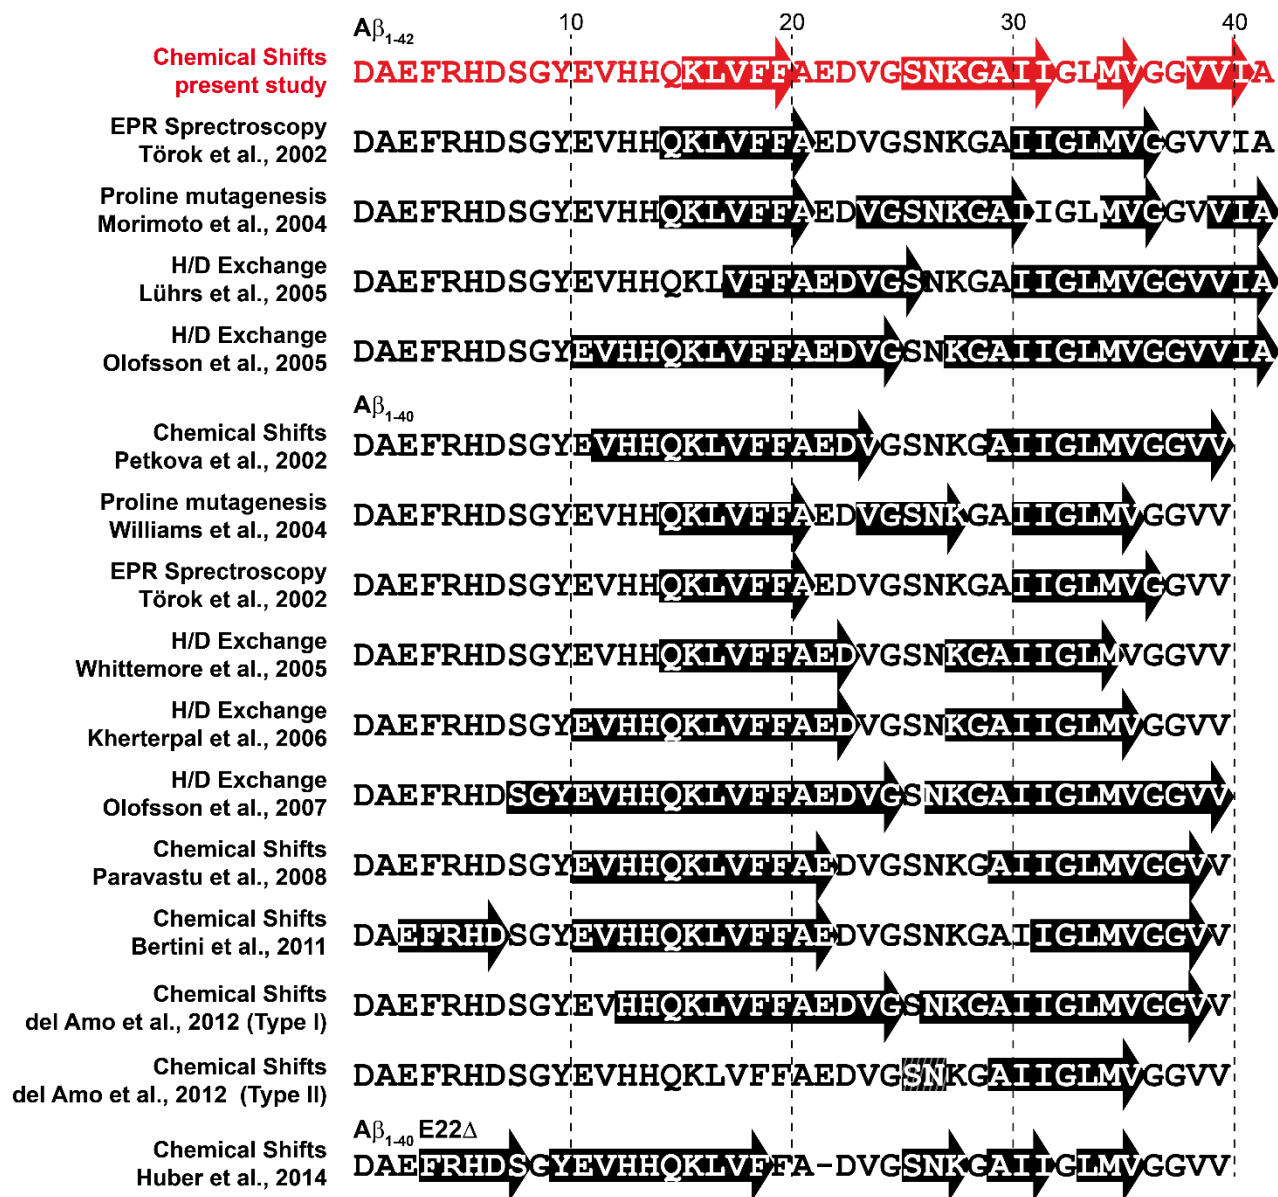

Figure S1. Comparison of the locations predicted β-strands (black arrows) and α-helix (shaded square) in various Aβ fibrils.<sup>1-14</sup>

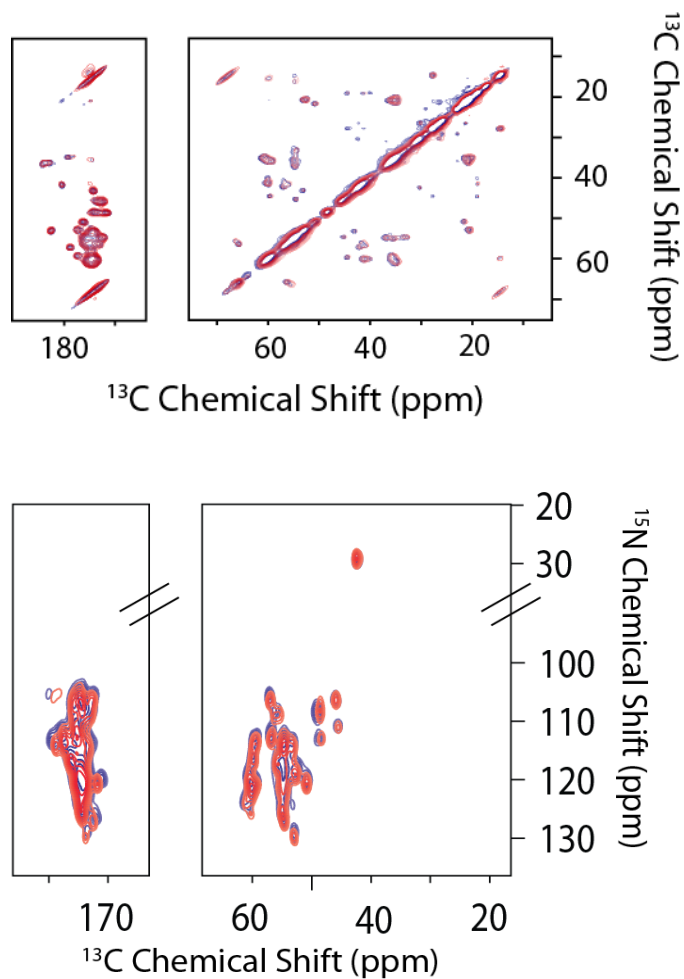

Figure S2. Overlay of samples prepared from lyophilized and rehydrated samples (blue) and samples which were always hydrated (red) demonstrating that lyophilization and rehydration does not have a significant impact on the fibril structure. (top) 1.6 ms mixing RFDOR spectrum recorded at 750 MHz,  $\omega_r/2\pi=20$  kHz, VT gas regulated to 277 K with 83 kHz CW  $^1\text{H}$  decoupling during evolution, and 83 kHz TPPM  $^1\text{H}$  decoupling during acquisition. (bottom) 1.6 ms mixing ZF-TEDOR spectrum recorded at 800 MHz,  $\omega_r/2\pi=20$  kHz, VT gas regulated to 277K with 83 kHz TPPM during acquisition.

## SUPPORTING TABLES

**Table S1.** MAS NMR Assignments for A $\beta$ <sub>M01-42</sub> amyloid fibrils

| Res Number | Res type | N       | CO     | CA    | CB    | CG     | CG1   | CG2   | CD    | CD1   | CD2   | CE     | CZ     | N     |
|------------|----------|---------|--------|-------|-------|--------|-------|-------|-------|-------|-------|--------|--------|-------|
| 0          | M        |         |        | 55.37 | 35.88 | 31.03  |       |       |       |       |       | 16.43  |        |       |
| 1          | D        |         |        | 54.28 | 42.26 |        |       |       |       |       |       |        |        |       |
| 2          | A        |         |        | 52.43 | 18.99 |        |       |       |       |       |       |        |        |       |
| 3          | E        |         |        | 56.49 | 29.83 | 35.94  |       |       | 183.3 |       |       |        |        |       |
| 4          | F        |         |        | 55.02 | 39.11 | 120    |       |       | 131.4 |       |       | 137.6  | 129.7  |       |
| 5          | R        | 121.90  | 176.50 | 54.09 | 33.14 | 27.10  |       |       |       |       |       |        | 159.22 |       |
| 6          | H        |         |        |       |       |        |       |       |       |       |       |        |        |       |
| 7          | D        |         | 172.16 |       |       |        |       |       |       |       |       |        |        |       |
| 8          | S        | 113.20  | 172.94 | 55.07 | 66.14 |        |       |       |       |       |       |        |        |       |
| 9          | G        | 110.658 | 172.2  | 48.24 |       |        |       |       |       |       |       |        |        |       |
| 10         | Y        | 113     | 176.8  | 55.00 | 41.35 | 135.8  |       |       | 132.4 |       |       | 117.2  | 156.4  |       |
| 11         | E        | 120.5   | 173.7  | 52.54 | 35.66 | 32.43  |       |       | 182.1 |       |       |        |        |       |
| 12         | V        | 124.6   | 172.1  | 60.25 |       |        |       |       |       |       |       |        |        |       |
| 13         | H        |         |        |       |       |        |       |       |       |       |       |        |        |       |
| 14         | H        |         |        |       |       |        |       |       |       |       |       |        |        |       |
| 15         | Q        |         |        |       |       |        |       |       |       |       |       |        |        |       |
| 16         | K        | 124.53  | 171.78 | 54.53 |       | 25.71  |       |       | 30.18 |       |       |        |        |       |
| 17         | L        | 132.09  | 174.41 | 54.20 | 44.76 | 28.71  |       |       |       | 22.44 | 25.45 |        |        |       |
| 18         | V        | 125.23  | 173.71 | 58.94 | 35.19 | 20.30  |       |       |       |       |       |        |        |       |
| 19         | F        | 130.35  | 174.38 | 59.89 | 40.29 | 139.61 |       |       | 130.5 |       |       | 129.67 |        |       |
| 20         | F        | 117.18  | 174.24 | 56.33 | 40.25 | 139.37 |       |       | 130.6 |       |       | 129.93 |        |       |
| 21         | A        | 123.47  | 176.69 | 52.25 | 20.28 |        |       |       |       |       |       |        |        |       |
| 22         | E        | 118.54  | 175.34 | 54.03 | 33.06 | 35.85  |       |       | 183.6 |       |       |        |        |       |
| 23         | D        | 121.95  | 175.36 | 55.42 | 40.98 | 179.95 |       |       |       |       |       |        |        |       |
| 24         | V        | 117.95  | 176.78 | 58.86 | 35.32 |        | 20.4  | 22.56 |       |       |       |        |        |       |
| 25         | G        | 117.21  | 173.73 | 47.71 |       |        |       |       |       |       |       |        |        |       |
| 26         | S        | 113.29  | 172.41 | 55.93 | 65.34 |        |       |       |       |       |       |        |        |       |
| 27         | N        | 118.53  | 173.76 | 52.81 | 42.70 |        |       |       |       |       |       |        |        |       |
| 28         | K        | 130.25  | 175.17 | 54.76 | 35.04 | 26.00  |       |       | 29.81 |       |       | 42.04  |        | 34.00 |
| 29         | G        | 112.48  | 171.06 | 48.16 |       |        |       |       |       |       |       |        |        |       |
| 30         | A        | 125.09  | 175.72 | 50.25 | 21.26 |        |       |       |       |       |       |        |        |       |
| 31         | I        | 121.06  | 173.38 | 59.30 | 44.02 |        | 27.35 | 18.65 |       | 14.07 |       |        |        |       |
| 32         | I        | 125.74  | 174.12 | 59.67 | 40.95 |        | 27.32 | 18.64 |       | 14.11 |       |        |        |       |
| 33         | G        | 110.76  | 172.22 | 45.39 |       |        |       |       |       |       |       |        |        |       |
| 34         | L        | 110.68  | 178.26 | 56.70 | 41.70 | 27.14  |       |       |       | 20.92 | 25.99 |        |        |       |
| 35         | M        | 118.64  | 172.99 | 54.48 | 36.38 | 30.62  |       |       |       |       |       | 17.00  |        |       |
| 36         | V        | 124.60  | 174.68 | 60.15 | 34.52 |        | 19.49 | 21.22 |       |       |       |        |        |       |
| 37         | G        | 115.37  | 173.30 | 45.03 |       |        |       |       |       |       |       |        |        |       |
| 38         | G        | 110.75  | 174.30 | 48.22 |       |        |       |       |       |       |       |        |        |       |
| 39         | V        | 129.15  | 174.50 | 61.13 | 34.67 |        | 20.22 | 21.13 |       |       |       |        |        |       |
| 40         | V        | 128.18  | 173.77 | 60.83 | 34.56 |        | 20.70 | 20.32 |       |       |       |        |        |       |
| 41         | I        | 127.45  | 173.03 | 59.58 | 39.48 |        | 27.40 | 18.61 |       | 14.18 |       |        |        |       |
| 42         | A        | 134.14  | 182.08 | 52.51 | 20.28 |        |       |       |       |       |       |        |        |       |

**Table S2.** TALOS+ predicted secondary structure

| Res Number | Res Type | Prob a-helix | Prob b-strand | Prob loop | Confidence | Secondary Structure |
|------------|----------|--------------|---------------|-----------|------------|---------------------|
| 0          | M        | 0.333        | 0.333         | 0.333     | 0          | L                   |
| 1          | D        | 0.333        | 0.333         | 0.333     | 0          | L                   |
| 2          | A        | 0.022        | 0             | 0.978     | 0.96       | L                   |
| 3          | E        | 0.028        | 0             | 0.972     | 0.94       | L                   |
| 4          | F        | 0.028        | 0             | 0.972     | 0.94       | L                   |
| 5          | R        | 0            | 0.366         | 0.634     | 0.27       | L                   |
| 6          | H        | 0            | 0             | 0         | 0          | X                   |
| 7          | D        | 0            | 0             | 0         | 0          | X                   |
| 8          | S        | 0.018        | 0.07          | 0.912     | 0.84       | L                   |
| 9          | G        | 0            | 0.064         | 0.936     | 0.87       | L                   |
| 10         | Y        | 0.012        | 0.188         | 0.801     | 0.61       | L                   |
| 11         | E        | 0            | 0.857         | 0.143     | 0.71       | E                   |
| 12         | V        | 0            | 0             | 0         | 0          | X                   |
| 13         | H        | 0            | 0             | 0         | 0          | X                   |
| 14         | H        | 0            | 0             | 0         | 0          | X                   |
| 15         | Q        | 0            | 0             | 0         | 0          | X                   |
| 16         | K        | 0            | 0.892         | 0.108     | 0.78       | E                   |
| 17         | L        | 0.007        | 0.955         | 0.038     | 0.92       | E                   |
| 18         | V        | 0.002        | 0.998         | 0         | 1          | E                   |
| 19         | F        | 0            | 0.945         | 0.055     | 0.89       | E                   |
| 20         | F        | 0            | 0.462         | 0.538     | 0.08       | L                   |
| 21         | A        | 0            | 0.168         | 0.832     | 0.66       | L                   |
| 22         | E        | 0.002        | 0.112         | 0.887     | 0.78       | L                   |
| 23         | D        | 0            | 0.171         | 0.829     | 0.66       | L                   |
| 24         | V        | 0            | 0.323         | 0.677     | 0.35       | L                   |
| 25         | G        | 0.003        | 0.207         | 0.79      | 0.58       | L                   |
| 26         | S        | 0            | 0.34          | 0.66      | 0.32       | L                   |
| 27         | N        | 0            | 0.83          | 0.17      | 0.66       | E                   |
| 28         | K        | 0            | 0.821         | 0.179     | 0.64       | E                   |
| 29         | G        | 0            | 0.634         | 0.366     | 0.27       | E                   |
| 30         | A        | 0            | 0.852         | 0.148     | 0.7        | E                   |
| 31         | I        | 0.002        | 0.989         | 0.009     | 0.98       | E                   |
| 32         | I        | 0            | 0.916         | 0.084     | 0.83       | E                   |
| 33         | G        | 0.02         | 0.293         | 0.687     | 0.39       | L                   |
| 34         | L        | 1E-3         | 0.241         | 0.758     | 0.52       | L                   |
| 35         | M        | 0            | 0.915         | 0.085     | 0.83       | E                   |
| 36         | V        | 0            | 0.953         | 0.047     | 0.91       | E                   |
| 37         | G        | 0            | 0.708         | 0.292     | 0.42       | E                   |
| 38         | G        | 0            | 0.457         | 0.543     | 0.09       | L                   |
| 39         | V        | 0            | 0.856         | 0.144     | 0.71       | E                   |
| 40         | V        | 0.002        | 0.99          | 0.007     | 0.98       | E                   |
| 41         | I        | 0            | 0.917         | 0.083     | 0.83       | E                   |
| 42         | A        | 0.333        | 0.333         | 0.333     | 0          | L                   |

**Table S3.** Secondary Chemical Shifts from TALOS+

| Residue | Res Type | Atom Type | Secondary Chemical Shifts | Experimental Chemical Shifts | Random Coil Chemical Shifts |
|---------|----------|-----------|---------------------------|------------------------------|-----------------------------|
| 0       | M        | CA        | 0.071                     | 55.371                       | 55.3                        |
| 0       | M        | CB        | 3.28                      | 35.88                        | 32.6                        |
| 1       | D        | CA        | 0.281                     | 54.281                       | 54                          |
| 1       | D        | CB        | 1.46                      | 42.26                        | 40.8                        |
| 2       | A        | CA        | 0.398                     | 52.435                       | 52.037                      |
| 2       | A        | CB        | -0.008                    | 18.992                       | 19                          |
| 3       | E        | CA        | 0.089                     | 56.489                       | 56.4                        |
| 3       | E        | CB        | 0.134                     | 29.834                       | 29.7                        |
| 4       | F        | CA        | -2.983                    | 55.017                       | 58                          |
| 4       | F        | CB        | 0.107                     | 39.107                       | 39                          |
| 5       | R        | CA        | -2.01                     | 54.09                        | 56.1                        |
| 5       | R        | CB        | 2.844                     | 33.144                       | 30.3                        |
| 8       | S        | N         | -3.666                    | 113.209                      | 116.875                     |
| 8       | S        | CA        | -3.131                    | 55.069                       | 58.2                        |
| 8       | S        | CB        | 2.94                      | 66.14                        | 63.2                        |
| 9       | G        | N         | -0.736                    | 110.658                      | 111.394                     |
| 9       | G        | CA        | 3.138                     | 48.238                       | 45.1                        |
| 10      | Y        | N         | -8.367                    | 113                          | 121.367                     |
| 10      | Y        | CA        | -3.1                      | 55                           | 58.1                        |
| 10      | Y        | CB        | 2.89                      | 41.35                        | 38.46                       |
| 11      | E        | CA        | -3.86                     | 52.54                        | 56.4                        |
| 11      | E        | CB        | 5.96                      | 35.66                        | 29.7                        |
| 16      | K        | N         | 2.569                     | 124.543                      | 121.974                     |
| 16      | K        | CA        | -1.754                    | 54.533                       | 56.287                      |
| 17      | L        | N         | 9.318                     | 132.086                      | 122.768                     |
| 17      | L        | CA        | -0.643                    | 54.197                       | 54.84                       |
| 17      | L        | CB        | 2.697                     | 44.756                       | 42.059                      |
| 18      | V        | N         | 3.817                     | 125.231                      | 121.414                     |
| 18      | V        | CA        | -3.365                    | 58.935                       | 62.3                        |
| 18      | V        | CB        | 3.367                     | 35.19                        | 31.823                      |
| 19      | F        | N         | 6.579                     | 130.354                      | 123.775                     |
| 19      | F        | CA        | 1.888                     | 59.888                       | 58                          |
| 19      | F        | CB        | 1.286                     | 40.286                       | 39                          |
| 20      | F        | N         | -4.025                    | 117.176                      | 121.201                     |
| 20      | F        | CA        | -1.669                    | 56.331                       | 58                          |
| 20      | F        | CB        | 1.245                     | 40.245                       | 39                          |
| 21      | A        | N         | -0.604                    | 123.467                      | 124.071                     |
| 21      | A        | CA        | 0.218                     | 52.255                       | 52.037                      |
| 21      | A        | CB        | 1.283                     | 20.283                       | 19                          |
| 22      | E        | N         | -1.456                    | 118.544                      | 120                         |
| 22      | E        | CA        | -2.375                    | 54.025                       | 56.4                        |
| 22      | E        | CB        | 3.364                     | 33.064                       | 29.7                        |
| 23      | D        | N         | -0.255                    | 121.945                      | 122.2                       |
| 23      | D        | CA        | 1.418                     | 55.418                       | 54                          |
| 23      | D        | CB        | 0.177                     | 40.977                       | 40.8                        |
| 24      | V        | N         | -3.136                    | 117.953                      | 121.089                     |
| 24      | V        | CA        | -3.443                    | 58.857                       | 62.3                        |
| 24      | V        | CB        | 3.5                       | 35.323                       | 31.823                      |
| 25      | G        | N         | 4.1                       | 117.205                      | 113.105                     |
| 25      | G        | CA        | 2.61                      | 47.71                        | 45.1                        |
| 26      | S        | N         | -3.476                    | 113.291                      | 116.767                     |
| 26      | S        | CA        | -2.274                    | 55.926                       | 58.2                        |
| 26      | S        | CB        | 2.137                     | 65.337                       | 63.2                        |
| 27      | N        | N         | -2.762                    | 118.532                      | 121.294                     |
| 27      | N        | CA        | -0.244                    | 52.806                       | 53.05                       |
| 27      | N        | CB        | 4.216                     | 42.703                       | 38.487                      |
| 28      | K        | N         | 8.695                     | 130.245                      | 121.55                      |
| 28      | K        | CA        | -1.528                    | 54.759                       | 56.287                      |
| 28      | K        | CB        | 2.539                     | 35.039                       | 32.5                        |
| 29      | G        | N         | 2.132                     | 112.477                      | 110.345                     |
| 29      | G        | CA        | 3.062                     | 48.162                       | 45.1                        |
| 30      | A        | N         | 1.6                       | 125.087                      | 123.487                     |
| 30      | A        | CA        | -1.784                    | 50.253                       | 52.037                      |
| 30      | A        | CB        | 2.263                     | 21.263                       | 19                          |
| 31      | I        | N         | 1.087                     | 121.057                      | 119.97                      |
| 31      | I        | CA        | -1.997                    | 59.303                       | 61.3                        |
| 31      | I        | CB        | 6.017                     | 44.017                       | 38                          |
| 32      | I        | N         | 1.029                     | 125.735                      | 124.706                     |
| 32      | I        | CA        | -1.632                    | 59.668                       | 61.3                        |
| 32      | I        | CB        | 2.946                     | 40.946                       | 38                          |
| 33      | G        | N         | -2.151                    | 110.785                      | 112.936                     |

|    |   |    |         |         |         |
|----|---|----|---------|---------|---------|
| 33 | G | CA | 0.293   | 45.393  | 45.1    |
| 34 | L | N  | -11.609 | 110.681 | 122.29  |
| 34 | L | CA | 1.861   | 56.701  | 54.84   |
| 34 | L | CB | -0.356  | 41.703  | 42.059  |
| 35 | M | N  | -2.461  | 118.639 | 121.1   |
| 35 | M | CA | -0.825  | 54.475  | 55.3    |
| 35 | M | CB | 3.783   | 36.383  | 32.6    |
| 36 | V | N  | 3.349   | 124.596 | 121.247 |
| 36 | V | CA | -2.15   | 60.15   | 62.3    |
| 36 | V | CB | 2.693   | 34.516  | 31.823  |
| 37 | G | N  | 2.741   | 115.366 | 112.625 |
| 37 | G | CA | -0.073  | 45.027  | 45.1    |
| 38 | G | N  | 0.89    | 110.757 | 109.867 |
| 38 | G | CA | 3.117   | 48.217  | 45.1    |
| 39 | V | N  | 8.169   | 129.15  | 120.981 |
| 39 | V | CA | -1.168  | 61.132  | 62.3    |
| 39 | V | CB | 2.845   | 34.668  | 31.823  |
| 40 | V | N  | 4.837   | 128.176 | 123.339 |
| 40 | V | CA | -1.469  | 60.831  | 62.3    |
| 40 | V | CB | 2.735   | 34.558  | 31.823  |
| 41 | I | N  | 3.055   | 127.45  | 124.395 |
| 41 | I | CA | -1.72   | 59.58   | 61.3    |
| 41 | I | CB | 1.479   | 39.479  | 38      |
| 42 | A | N  | 7.183   | 134.139 | 126.956 |
| 42 | A | CA | 0.474   | 52.511  | 52.037  |
| 42 | A | CB | 1.275   | 20.275  | 19      |

**Table S4.** Acquisition parameters

|                                       | <b>3D NCACX</b>                           | <b>3D NCOCX</b>                           | <b>3D CONCA</b>                           | <b>2D <sup>13</sup>C-<sup>13</sup>C-DARR</b> | <b>2D <sup>13</sup>C-<sup>13</sup>C-RFDR</b> | <b>2D <sup>13</sup>C-<sup>15</sup>N-TEDOR</b> | <b>2D <sup>13</sup>C-<sup>13</sup>C-TOBSY</b> |
|---------------------------------------|-------------------------------------------|-------------------------------------------|-------------------------------------------|----------------------------------------------|----------------------------------------------|-----------------------------------------------|-----------------------------------------------|
| <sup>1</sup> H Larmor frequency (MHz) | 800                                       | 750                                       | 750                                       | 800                                          | 800                                          | 800                                           | 800                                           |
| Isotope labeling                      | <sup>U-<sup>13</sup>C<sup>15</sup>N</sup> | <sup>U-<sup>13</sup>C<sup>15</sup>N</sup> | <sup>U-<sup>13</sup>C<sup>15</sup>N</sup> | <sup>U-<sup>13</sup>C<sup>15</sup>N</sup>    | <sup>U-<sup>13</sup>C<sup>15</sup>N</sup>    | <sup>U-<sup>13</sup>C<sup>15</sup>N</sup>     | <sup>U-<sup>13</sup>C<sup>15</sup>N</sup>     |
| MAS frequency (kHz)                   | 12.5                                      | 12.5                                      | 12.5                                      | 20                                           | 20                                           | 20                                            | 21                                            |
| <b>TRANSFER 1</b>                     | <b>HN-CP</b>                              | <b>HN-CP</b>                              | <b>HC-CP</b>                              | <b>HC-CP</b>                                 | <b>HC-CP</b>                                 | <b>HC-CP</b>                                  | <b>HC-INEPT</b>                               |
| <sup>1</sup> H field (kHz)            | 62.5                                      | 62.5                                      | 62.5                                      | 62.5                                         | 62.5                                         | 62.5                                          | -                                             |
| X field (kHz)                         | 50                                        | 50                                        | 83                                        | 62.5                                         | 62.5                                         | 83                                            | -                                             |
| Shape                                 | Ramp (100-70%)                            | Ramp (100-70%)                            | Ramp (100-70%)                            | Ramp (100-70%)                               | Ramp (100-70%)                               | Ramp (70-100%)                                | -                                             |
| Carrier (ppm)                         | -                                         | -                                         | -                                         | 95                                           | 95                                           | 95                                            | -                                             |
| Time (ms)                             | 2                                         | 2                                         | 1.2                                       | 1.2                                          | 1.2                                          | 1.2                                           | -                                             |
| <b>TRANSFER 2</b>                     | <b>NC-CP</b>                              | <b>NC-CP</b>                              | <b>CN-CP</b>                              | <b>DARR</b>                                  | <b>RFDR</b>                                  | <b>TEDOR</b>                                  | <b>TOBSY (P9-1-6)</b>                         |
| <sup>1</sup> H field (kHz)            | 100                                       | 100                                       | 100                                       | 20                                           | 83                                           | 83                                            | 83                                            |
| <sup>13</sup> C field (kHz)           | 30                                        | 62.5                                      | 62.5                                      | -                                            | 62.5*                                        | 50                                            | 60                                            |
| <sup>15</sup> N field (kHz)           | 42.5                                      | 50                                        | 50                                        | -                                            | -                                            | 50                                            | -                                             |
| Shape                                 | Ramp (100-90%)                            | Ramp (100-70%)                            | Ramp (100-70%)                            | -                                            | -                                            | -                                             | -                                             |
| Carrier (ppm)                         | 55                                        | 165                                       | 165                                       | -                                            | 95                                           | 95                                            | 30                                            |
| Time (ms)                             | 4                                         | 4                                         | 4                                         | 80                                           | 1.6                                          | 3.                                            | 9.6                                           |
| <b>TRANSFER 3</b>                     | <b>DARR</b>                               | <b>DARR</b>                               | <b>NC-CP</b>                              | -                                            | -                                            | -                                             | -                                             |
| <sup>1</sup> H field (kHz)            | 12.5                                      | 12.5                                      | 100                                       | -                                            | -                                            | -                                             | -                                             |
| X field (kHz)                         | -                                         | -                                         | -                                         | -                                            | -                                            | -                                             | -                                             |
| Shape                                 | -                                         | -                                         | -                                         | -                                            | -                                            | -                                             | -                                             |
| Carrier (ppm)                         | -                                         | -                                         | 55                                        | -                                            | -                                            | -                                             | -                                             |
| Time (ms)                             | 80                                        | 80                                        | 5                                         | -                                            | -                                            | -                                             | -                                             |
| t <sub>1</sub> increments             | 128                                       | 240                                       | 160                                       | 1024                                         | 1024                                         | 512                                           | 256                                           |
| Sweep width (t <sub>1</sub> ) (ppm)   | 29.1                                      | 199                                       | 199                                       | 199                                          | 199                                          | 199                                           | 79                                            |
| Max. acq. time (t <sub>1</sub> ) (ms) | 27.2                                      | 12.8                                      | 12.8                                      | 12.8                                         | 12.8                                         | 12.8                                          | 8                                             |
| t <sub>2</sub> increments             | 160                                       | 260                                       | 260                                       | 2048                                         | 2048                                         | 2048                                          | 2376                                          |



|                                         | <b>3D NCACX</b> | <b>3D NCOCX</b> | <b>3D CONCA</b> | <b>2D <sup>13</sup>C-<sup>13</sup>C-DARR</b> | <b>2D <sup>13</sup>C-<sup>13</sup>C-RFDR</b> | <b>2D <sup>13</sup>C-<sup>15</sup>N-TEDOR</b> | <b>2D <sup>13</sup>C-<sup>13</sup>C-TOBSY</b> |
|-----------------------------------------|-----------------|-----------------|-----------------|----------------------------------------------|----------------------------------------------|-----------------------------------------------|-----------------------------------------------|
| Size of real spectrum (t <sub>1</sub> ) | 256             | 240             | 160             | 2048                                         | 2048                                         | 512                                           | 512                                           |
| Window function (WDW) (t <sub>1</sub> ) | Gauss           | Gauss           | Gauss           | Squared sine                                 | Squared sine                                 | Gauss                                         | Gauss                                         |
| WDW - LB (Hz) (t <sub>1</sub> )         | 20              | 20              | 20              | -                                            | -                                            | 20                                            | 20                                            |
| WDW - GB (t <sub>1</sub> )              | 0.1             | 0.1             | 0.1             | -                                            | -                                            | 0.05                                          | 0.03                                          |
| WDW - SSB (t <sub>1</sub> )             | -               | -               | -               | 3.5                                          | 3.5                                          | -                                             | -                                             |
| Size of real spectrum (t <sub>2</sub> ) | 512             | 260             | 240             | 4096                                         | 4096                                         | 1024                                          | 8192                                          |
| Window function (WDW) (t <sub>2</sub> ) | Gauss           | Gauss           | Gauss           | Squared sine                                 | Squared sine                                 | Gauss                                         | Gauss                                         |
| WDW - LB (Hz) (t <sub>2</sub> )         | 20              | 20              | 20              | -                                            | -                                            | 20                                            | 20                                            |
| WDW - GB (t <sub>2</sub> )              | 0.1             | 0.1             | 0.1             | -                                            | -                                            | 0.05                                          | 0.03                                          |
| WDW - SSB (t <sub>2</sub> )             | -               | -               | -               | 3.5                                          | 3.5                                          | -                                             | -                                             |
| Size of real spectrum (t <sub>3</sub> ) | 4096            | 1024            | 1024            | -                                            | -                                            | -                                             | -                                             |
| Window function (WDW) (t <sub>3</sub> ) | Gauss           | Gauss           | Gauss           | -                                            | -                                            | -                                             | -                                             |
| WDW - (Hz) (t <sub>3</sub> )            | 20              | 20              | 20              | -                                            | -                                            | -                                             | -                                             |
| WDW - GB (t <sub>3</sub> )              | 0.1             | 0.1             | 0.1             | -                                            | -                                            | -                                             | -                                             |
| WDW - SSB (t <sub>3</sub> )             | -               | -               | -               | -                                            | -                                            | -                                             | -                                             |

## References

- (1) Morimoto, A.; Irie, K.; Murakami, K.; Masuda, Y.; Ohigashi, H.; Nagao, M.; Fukuda, H.; Shimizu, T.; Shirasawa, T. *J Biol Chem* **2004**, *279*, 52781.
- (2) Luhrs, T.; Ritter, C.; Adrian, M.; Riek-Loher, D.; Bohrmann, B.; Doeli, H.; Schubert, D.; Riek, R. *P Natl Acad Sci USA* **2005**, *102*, 17342.
- (3) Bertini, I.; Gonnelli, L.; Luchinat, C.; Mao, J. F.; Nesi, A. *J Am Chem Soc* **2011**, *133*, 16013.
- (4) Huber, M.; Ovchinnikova, O. Y.; Schutz, A. K.; Glockshuber, R.; Meier, B. H.; Bockmann, A. *Biomolecular NMR Assignments* **2014**.
- (5) Petkova, A. T.; Ishii, Y.; Balbach, J. J.; Antzutkin, O. N.; Leapman, R. D.; Delaglio, F.; Tycko, R. *P Natl Acad Sci USA* **2002**, *99*, 16742.
- (6) Paravastu, A. K.; Leapman, R. D.; Yau, W. M.; Tycko, R. *P Natl Acad Sci USA* **2008**, *105*, 18349.
- (7) Olofsson, A.; Lindhagen-Persson, M.; Sauer-Eriksson, A. E.; Ohman, A. *Biochem J* **2007**, *404*, 63.
- (8) Kheterpal, I.; Wetzel, R. *Accounts Chem Res* **2006**, *39*, 584.
- (9) Williams, A. D.; Portelius, E.; Kheterpal, I.; Guo, J. T.; Cook, K. D.; Xu, Y.; Wetzel, R. *J Mol Biol* **2004**, *335*, 833.
- (10) Olofsson, A.; Lindhagen-Persson, M.; Sauer-Eriksson, A. E.; Ohman, A. *Amyloid* **2006**, *13*, 50.
- (11) Olofsson, A.; Sauer-Eriksson, A. E.; Ohman, A. *J Biol Chem* **2006**, *281*, 477.
- (12) Whittemore, N. A.; Mishra, R.; Kheterpal, I.; Williams, A. D.; Wetzel, R.; Serpersu, E. H. *Biochemistry-US* **2005**, *44*, 4434.
- (13) Torok, M.; Milton, S.; Kaye, R.; Wu, P.; McIntire, T.; Glabe, C. G.; Langen, R. *J Biol Chem* **2002**, *277*, 40810.
- (14) Lopez del Amo, J. M.; Schmidt, M.; Fink, U.; Dasari, M.; Fandrich, M.; Reif, B. *Angew Chem Int Edit* **2012**, *51*, 6136.
